# Supplementary material for: A Cross-Species Analysis of MicroRNAs in the Developing Avian Face
Source: PLoS One. 2012 Apr 16;7(4):e35111. doi: 10.1371/journal.pone.0035111 (PMC3327661; doi:10.1371/journal.pone.0035111)
Supplement: Table S4 — Complete list of enriched GO annotations of avian specific miRNAs. Predicted targets of individual miRNA were further searched for GO annotation enrichment by the ToppGene software suite (http://toppgene.cchmc.org/). Due to the limited number of predicted downstream targets for gga-miR-1559 (two predicted targets, see Table S3) it was not included for enrichment analyses. Statistically significant GO annotations (p value<0.05 after Bonferroni correction) are listed for individual miRNAs. (XLSX) [file pone.0035111.s005.xlsx]

## Sheet: Sheet1
gga-miR-2131
GO ID	Category	P-value
GO:0043565	sequence-specific DNA binding	0.000504
GO:0006357	regulation of transcription from RNA polymerase II promoter	0.000608
GO:0030528	transcription regulator activity	0.001219
GO:0010628	positive regulation of gene expression	0.001944
GO:0045941	positive regulation of transcription	0.003193
GO:0006366	transcription from RNA polymerase II promoter	0.003319
GO:0045944	positive regulation of transcription from RNA polymerase II promoter	0.006753
GO:0045595	regulation of cell differentiation	0.007342
GO:0003700	sequence-specific DNA binding transcription factor activity	0.007505
GO:0001071	nucleic acid binding transcription factor activity	0.007612
GO:0043566	structure-specific DNA binding	0.009942
GO:0007163	establishment or maintenance of cell polarity	0.014115
GO:0045935	positive regulation of nucleobase, nucleoside, nucleotide and nucleic acid metabolic process	0.016248
GO:0016563	transcription activator activity	0.01679
GO:2000113	negative regulation of cellular macromolecule biosynthetic process	0.022157
GO:0010557	positive regulation of macromolecule biosynthetic process	0.023885
GO:0045893	positive regulation of transcription, DNA-dependent	0.024178
GO:0051173	positive regulation of nitrogen compound metabolic process	0.024589
GO:0051254	positive regulation of RNA metabolic process	0.027463
GO:0005516	calmodulin binding	0.028139
GO:0008134	transcription factor binding	0.029069
GO:0010843	promoter binding	0.035355
GO:0010558	negative regulation of macromolecule biosynthetic process	0.03556
GO:0000975	regulatory region DNA binding	0.042984
GO:0044212	transcription regulatory region DNA binding	0.042984
GO:0001067	regulatory region nucleic acid binding	0.042984
GO:0048187	inhibin beta-B binding	0.045654
GO:0016362	activin receptor activity, type II	0.045654
GO:0048699	generation of neurons	0.047622
gga-miR-2131*
GO ID	Category	P-value
GO:0051649	establishment of localization in cell	0.019429
GO:0046907	intracellular transport	0.026487
GO:0030234	enzyme regulator activity	0.049616
gga-miR-2954
GO ID	Category	P-value
GO:0045663	positive regulation of myoblast differentiation	0.017774
GO:0016202	regulation of striated muscle tissue development	0.020609
GO:0048634	regulation of muscle organ development	0.022484
gga-miR-2954 *
GO ID	Category	P-value
GO:0070035	purine NTP-dependent helicase activity	0.041624
GO:0008026	ATP-dependent helicase activity	0.041624
gga-miR-1451
GO ID	Category	P-value
GO:0043565	sequence-specific DNA binding	9.1e-05
GO:0003700	sequence-specific DNA binding transcription factor activity	0.000575
GO:0001071	nucleic acid binding transcription factor activity	0.000578
GO:0008267	poly-glutamine tract binding	0.010759
GO:0050815	phosphoserine binding	0.043012
