# Supplementary material for: A Cross-Species Analysis of MicroRNAs in the Developing Avian Face
Source: PLoS One. 2012 Apr 16;7(4):e35111. doi: 10.1371/journal.pone.0035111 (PMC3327661; doi:10.1371/journal.pone.0035111)
Supplement: Table S5 — qRT-PCR validation of miRNA sequencing data. Delta Ct (cycle threshold) values for all miRNAs relative to RNU6B input control. Note that values are on a log2 scale, with more positive values being more highly expressed. (XLS) [file pone.0035111.s006.xls]

## Sheet: Supplemental Table 3
	Chick HH20	Chick HH25	Duck HH20	Duck HH25	Overall trend from	Overall trend from sequencing
					qRT-PCR
gga-let-7a	2.13	3.9	3.54	6.05	Higher at HH25 than HH20 in both species	Higher at HH25 than HH20 in both species
gga-miR-146b	1	0.5	3.29	3.84	Higher in duck than chick at both stages	Higher in duck than chick at both stages
gga-miR-16	4	3.79	5.15	5.84	Higher in duck than chick at both stages	Higher in duck than chick at both stages
gga-miR-183	-2.65	-2.29	-0.68	-0.96	Higher in duck than chick at both stages	Higher in duck than chick at both stages
gga-miR-200a	-0.29	-0.44	1.74	1.14	Higher in duck than chick at both stages	Higher in duck than chick at both stages
gga-miR-200b	-1.2	-1.16	0.98	0.11	Higher in duck than chick at both stages	Higher in duck than chick at both stages
gga-miR-203	-4.52	-4.58	-2.5	-0.04	Higher in duck than chick at both stages	Higher in duck than chick at both stages
gga-miR-215	-6.67	-6.3	-8.02	-6.35	Higher in chicken than duck only at HH20	Higher in chicken than duck at both stages
gga-miR-222	5.23	4.19	6.61	7.01	Higher in duck than chick only at HH25	Higher in duck than chick only at HH25
hsa-miR-143	3.16	3.06	4.05	5.66	Higher in duck than chick at both stages	Higher in duck than chick at both stages
