# Supplementary material for: A Cross-Species Analysis of MicroRNAs in the Developing Avian Face
Source: PLoS One. 2012 Apr 16;7(4):e35111. doi: 10.1371/journal.pone.0035111 (PMC3327661; doi:10.1371/journal.pone.0035111)
Supplement: Table S6 — DESeq analysis of differentially expressed miRNAs. Accompanying each miRNA are fold changes (FC) on a log2 scale and a p-value. The analysis was conducted with DESeq [92] using default parameters with the following options used to estimate the dispersions: (1) the “fit-only” sharingMode was used for all datasets, (2) the “blind” method was used only for the quail dataset, and (3) a “local” fitType was used only when estimating dispersions with stage 25. (XLSX) [file pone.0035111.s007.xlsx]

## Sheet: Sheet1
Expressed at higher levels at HH20 than HH25 in all three species
microRNA	Chicken HH25 vs HH20		Duck HH25 vs HH20		Quail HH25 vs HH20
	FC log2	pval	FC log2	pval	FC log2	pval
gga-miR-122	2.94074	0.00740765	0.983358	0.140209	-3.02176	0.000952446
gga-miR-142-3p	-1.12386	0.399148	-1.04908	0.21312	-0.786775	0.307461
gga-miR-2954*	-0.672138	0.31409	-1.01858	0.117647	-1.09295	0.128743
gga-miR-302b	-2.55598	0.0207743	-2.7051	0.00011426	-1.72557	0.0229509
gga-miR-302b*	-2.55598	0.0207743	-2.7051	0.00011426	-1.72557	0.0229509
gga-miR-302c	-2.16313	0.0419247	-2.58625	0.000125925	-1.56824	0.0397976
hsa-miR-1246	1.69656	0.422419	1.12459	0.374545	-1.93534	0.0925987
hsa-miR-148b	-0.700403	0.556999	-1.22643	0.229628	-0.744124	0.300961
hsa-miR-369-3p	2.43178	0.167797	1.16589	0.306464	-1.98952	0.206927
hsa-miR-423-5p	-0.0520326	0.972218	-1.68491	0.644919	-1.69522	0.173341
hsa-miR-92a-2*	-0.763426	0.531089	-0.839625	0.225648	-0.514379	0.486909
hsa-miR-96	-0.441379	0.94375	-1.09063	0.105538	-0.971684	0.338435
Expressed at higher levels at HH25 than HH20 in all three species
microRNA	Chicken HH25 vs HH20		Duck HH25 vs HH20		Quail HH25 vs HH20
	FC log2	pval	FC log2	pval	FC log2	pval
gga-let-7a	2.38309	0.014786	1.33352	0.0217855	1.20769	0.0937465
gga-let-7a*	2.38309	0.014786	1.33352	0.0217855	1.20769	0.0937465
gga-let-7c*	1.84158	0.03983	0.738057	0.0821062	1.09001	0.129425
gga-let-7d	2.3542	0.204024	1.49654	0.103172	0.915081	0.394941
gga-let-7f	1.73528	0.0778297	1.72833	0.0180831	0.911925	0.203288
gga-let-7g	2.6561	0.0105432	2.02701	0.00224718	0.933562	0.199557
gga-let-7i	4.02096	0.00288087	2.60998	0.00124734	0.599667	0.626246
gga-let-7k	1.75927	0.0866056	0.341658	0.849615	0.434533	0.57948
gga-miR-107	0.426142	0.759218	0.716006	0.558905	0.459181	0.57401
gga-miR-15b	0.943349	0.407852	0.792347	0.401879	0.297992	0.686732
gga-miR-15c	1.12294	0.304334	0.782353	0.32429	0.697137	0.361959
gga-miR-218	1.40203	0.174537	1.03672	0.13314	0.526797	0.471444
gga-miR-30a-3p	0.0236188	0.843838	0.35307	0.97639	0.450447	0.527887
gga-miR-30a-5p	1.90858	0.0806575	0.818889	0.292576	0.781122	0.274728
gga-miR-30d*	0.438359	0.695651	0.390651	0.671306	0.467645	0.511762
gga-miR-30e*	1.06489	0.285341	0.48535	0.457312	0.154013	0.828097
hsa-miR-1261	1.81274	0.0871729	1.0441	0.0954153	1.4544	0.281344
Expressed at higher levels in duck versus quail and chicken at both HH20 and HH25
microRNA	HH20 Duck vs Chick		HH25 Duck vs Chick		HH20 Duck vs Quail		HH25 Duck vs Quail
	FC log2	pval	FC log2	pval	FC log2	pval	FC log2	pval
gga-miR-106*	0.277466	0.884617	0.994228	0.433689	2.63776	0.163989	1.87409	0.302683
gga-miR-144*	1.49322	0.280431	1.31751	0.189022	0.772849	0.682365	2.20314	0.197868
gga-miR-146b	3.51449	4.69234e-05	3.43856	0.00537245	3.81268	0.00148004	3.06676	0.0707363
gga-miR-1552-5p	2.2939	0.00997066	3.0085	0.0372131	1.16404	0.366001	1.88374	0.379681
gga-miR-16c	0.682516	0.343423	0.678363	0.336649	1.40675	0.205972	0.917401	0.338719
gga-miR-183	0.396698	0.660875	-0.120398	0.564742	1.72883	0.125274	0.562411	0.852962
gga-miR-200a	1.58856	0.0747751	1.47233	0.502516	0.284503	0.971575	0.274339	0.904818
gga-miR-200b	1.1533	0.254678	0.570212	1	0.0135633	0.791414	0.0650197	0.830382
gga-miR-203	0.892062	0.478678	2.52958	0.0770368	0.393416	0.994362	1.78629	0.384006
gga-miR-24	0.407093	0.606214	1.29929	0.136982	1.34668	0.240425	0.887299	0.469391
gga-miR-27b	0.546992	0.476499	1.24878	0.177373	1.18971	0.288573	1.02634	0.447823
hsa-miR-182	0.0984899	0.925935	-0.343548	0.406405	1.62287	0.130316	0.709109	0.669519
hsa-miR-23a	1.00894	0.265045	1.97779	0.180201	0.828486	0.434483	1.23224	0.588854
hsa-miR-27a	1.30867	0.109068	2.13724	0.0734335	1.77183	0.113085	1.80962	0.278624
hsa-miR-363*	-0.265269	0.84098	-0.5173	0.550397	0.0851637	0.960604	-0.604583	0.461489
Expressed at higher levels in quail and chicken versus duck at both HH20 and HH25
microRNA	HH20 Duck vs Chick		HH25 Duck vs Chick		HH20 Duck vs Quail		HH25 Duck vs Quail
	FC log2	pval	FC log2	pval	FC log2	pval	FC log2	pval
gga-miR-18a*	-0.99467	0.308687	-1.16572	0.41171	-0.423996	0.754935	-1.02813	0.439375
gga-miR-215	-3.35079	0.00133406	-3.40923	0.0480036	-3.25059	0.00219328	-3.243	0.0679517
gga-miR-2964	-1.82247	0.076748	-1.28318	0.40982	-1.70645	0.0984406	-1.76442	0.26858
gga-miR-3529	-3.74958	0.000223466	-3.2799	0.0476332	-5.37582	1.57988e-06	-6.07587	0.00185573
tgu-miR-1388	-2.18146	0.101877	-3.13136	0.0399546	-1.13237	0.375422	-2.58099	0.115895
tgu-miR-2970	-3.03745	0.00159862	-3.27203	0.0541012	-2.88295	0.00322403	-3.2528	0.0663476
Expressed at higher levels in quail and chicken versus duck only at HH25
microRNA	HH25 Duck vs Chick		HH25 Duck vs Quail		HH20 Duck vs Chick		HH20 Duck vs Quail
	FC log2	pval	FC log2	pval	FC log2	pval	FC log2	pval
gga-let-7c	-0.612711	0.345929	0.323613	0.766333	0.251535	1	0.766881	0.721446
gga-miR-100*	-1.69023	0.0825236	-0.546284	0.593369	-0.815508	0.291935	-0.404768	0.526245
gga-miR-125b*	-1.53248	0.113753	-0.0963688	1	-1.44664	0.0962954	-0.153055	0.78774
gga-miR-137	-3.1578	0.0709427	-0.0944642	0.84854	0.529774	0.565593	1.09815	0.464863
gga-miR-148a*	0.630332	0.414608	-0.345875	0.607724	0.120343	1	0.45428	0.797079
gga-miR-30c-2*	0.0926345	0.900412	0.0170921	1	0.492376	0.637473	0.779789	0.494357
hsa-miR-129-5p	-0.157053	0.998364	0.308532	0.977198	0.436612	0.572181	1.51712	0.195103
Expressed at higher levels in duck versus quail and chicken only at HH25
microRNA	HH25 Duck vs Chick		HH25 Duck vs Quail		HH20 Duck vs Chick		HH20 Duck vs Quail
	FC log2	pval	FC log2	pval	FC log2	pval	FC log2	pval
gga-miR-10b	-0.213511	0.793139	-0.0608557	1	-0.517305	0.759899	-2.63865	0.198565
gga-miR-142-5p	1.49389	0.212858	1.22897	0.48055	0.244654	0.873392	0.159677	0.977105
gga-miR-205a	2.48198	0.0874562	0.328439	0.992421	0.0263126	0.719043	-2.28552	0.0123068
gga-miR-22*	1.1632	0.377786	-0.637182	0.644591	1.17224	0.171767	0.694128	0.587516
gga-miR-222	1.14235	0.449544	0.973071	0.675356	0.010156	0.992396	0.361385	0.779098
gga-miR-454	0.767611	0.446058	0.48442	0.744115	0.684269	0.368574	0.608923	0.505238
gga-miR-551	1.31727	0.334558	-0.0647959	0.849904	0.532949	0.591526	-0.312369	0.778979
